# Supplementary material
Source: publisher figshare collection journal article supplement (https://tandf.figshare.com/articles/dataset/_/3100810)

**Distance (cm)**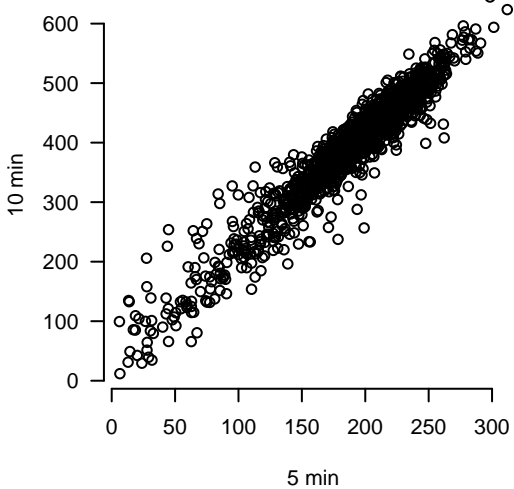**Proportion in center (%)**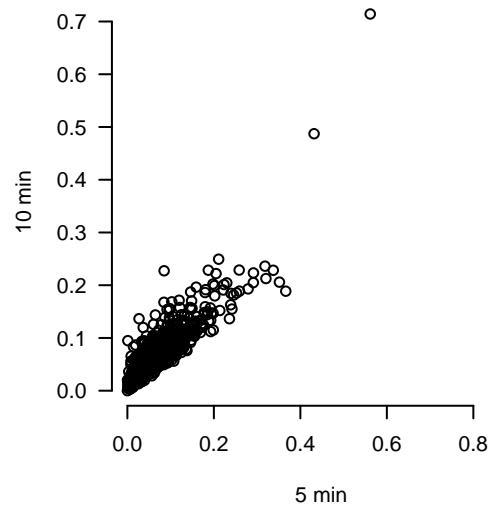**CW movement (No.)**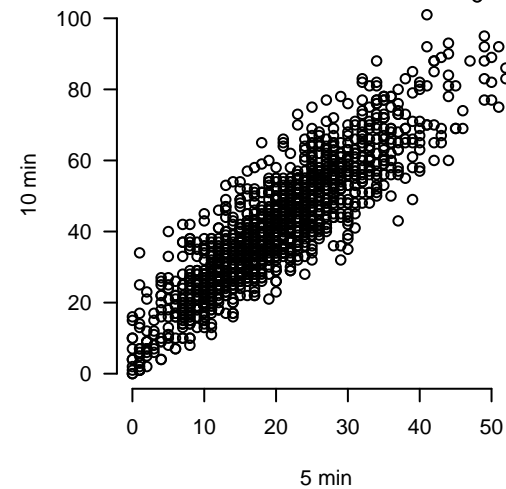**CCW movement (No.)**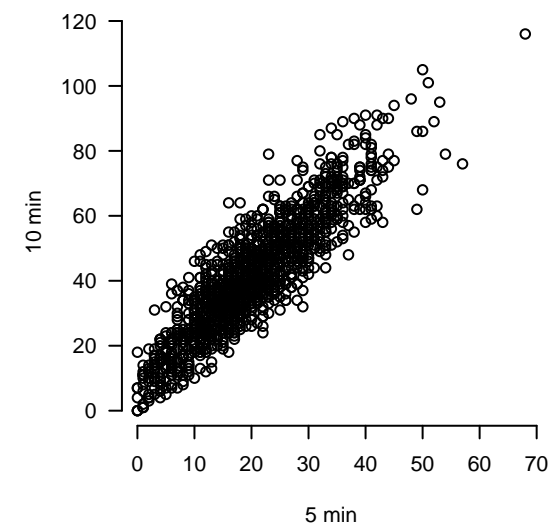**PC1**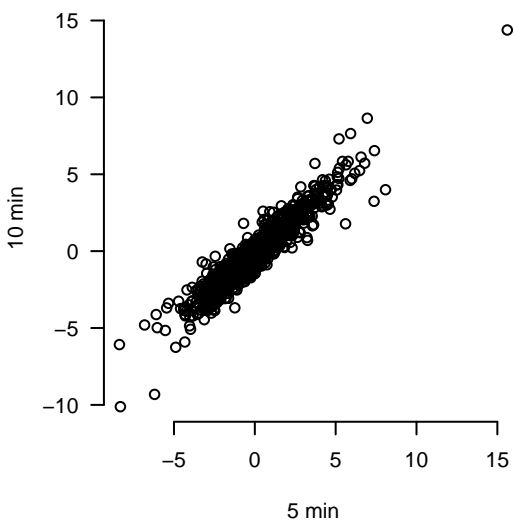**PC2**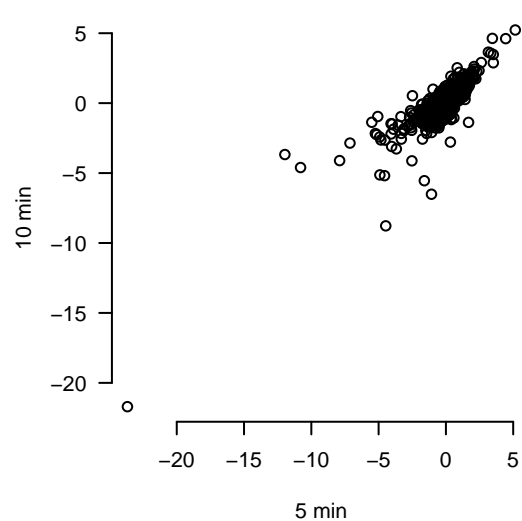**Mean time inactive (s)**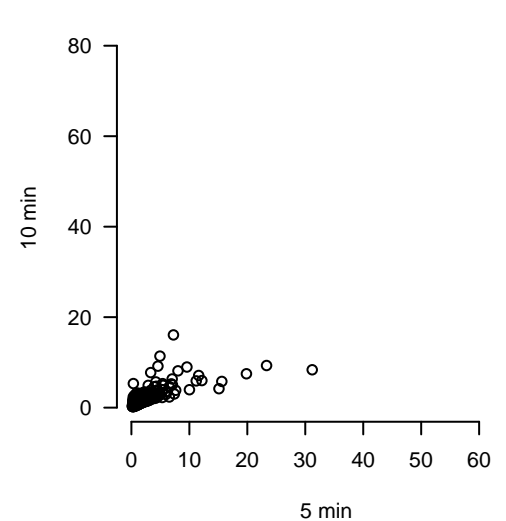**Mean time active (s)**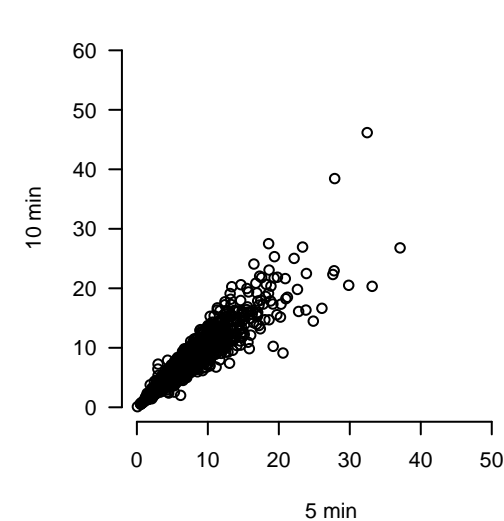**Max time inactive (s)**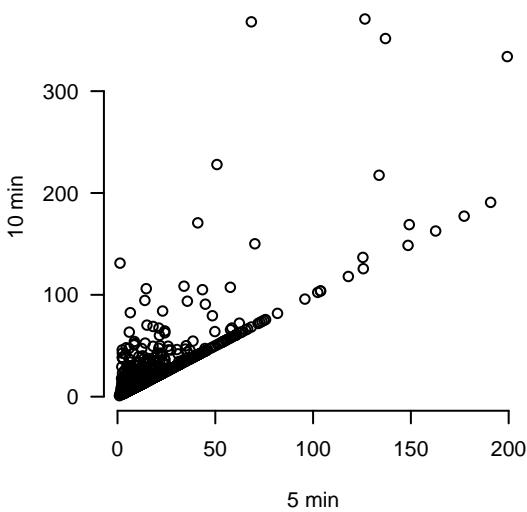**Max time active (s)**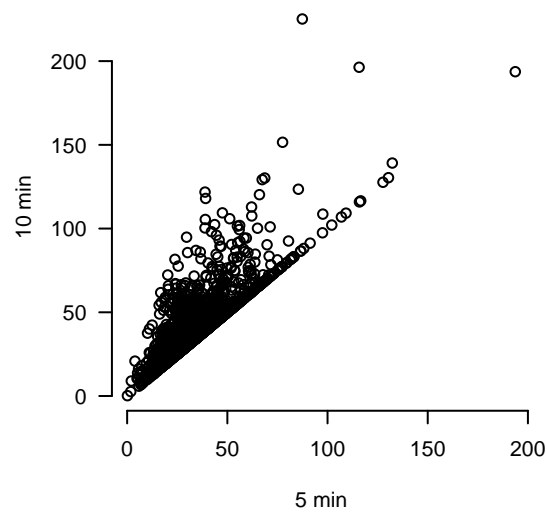**No. behav**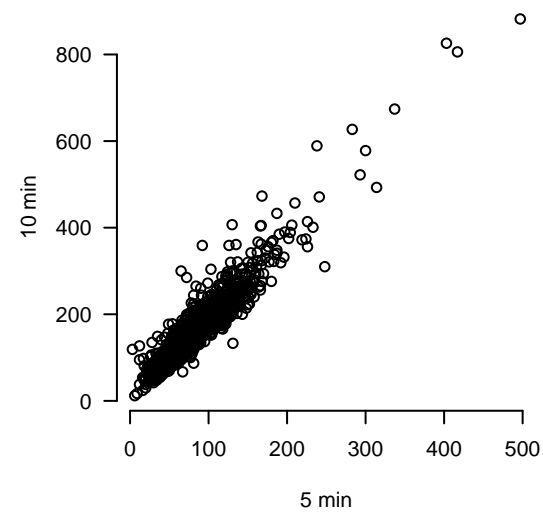

Supplement: Supplementary file 1 [file 2]
