# Supplementary material
Source: publisher figshare collection journal article supplement (https://tandf.figshare.com/articles/dataset/_/3100810)
Supplement: Supplementary file 2 [file 2]

**Table S1:** ANOVA table for the subtrait DISTANCE. The table contains effects of replicate (P) and genotype (G), i.e.,  $Mi\{ET1\}$  vs  $w^{1118}$ . P-values are adjusted for multiple testing using a false-discovery rate (FDR). Significance levels are indicated by asterisks; \*\*\*: FDR adjusted P-value < 0.001, \*\*: FDR adjusted P-value < 0.01, \*: FDR adjusted P-value < 0.05, ns: FDR adjusted P-value > 0.05.  $Mi\{ET1\}$  in bold indicates a significant phenotypic effect (FDR adjusted P-value<0.05) of disrupting the target gene.

| $Mi\{ET1\}$  | Effect | Df | F value | Pr(>F)  | FDR |
|--------------|--------|----|---------|---------|-----|
| <b>23767</b> | P      | 43 | 4.99    | 2.2E-16 | *** |
|              | G      | 1  | 24.63   | 1.2E-06 | *** |
| 24213        | P      | 43 | 4.36    | 3.3E-14 | *** |
|              | G      | 1  | 0.49    | 0.48    | ns  |
| 24228        | P      | 43 | 3.23    | 3.1E-09 | *** |
|              | G      | 1  | 0.76    | 0.38    | ns  |
| <b>24240</b> | P      | 43 | 3.17    | 5.3E-09 | *** |
|              | G      | 1  | 12.91   | 3.9E-04 | *** |
| 24283        | P      | 43 | 4.62    | 2.8E-15 | *** |
|              | G      | 1  | 0.37    | 0.54    | ns  |
| <b>24687</b> | P      | 43 | 3.32    | 9.5E-10 | *** |
|              | G      | 1  | 25.38   | 8.4E-07 | *** |
| <b>25509</b> | P      | 43 | 3.40    | 4.6E-10 | *** |
|              | G      | 1  | 14.46   | 18E-04  | *** |
| <b>25518</b> | P      | 43 | 3.99    | 9.6E-13 | *** |
|              | G      | 1  | 15.00   | 1.3E-04 | *** |
| <b>25519</b> | P      | 43 | 4.13    | 2.7E-13 | *** |
|              | G      | 1  | 35.21   | 8.7E-09 | *** |
| 25547        | P      | 43 | 4.28    | 6.7E-14 | *** |
|              | G      | 1  | 2.05    | 0.15    | ns  |
| <b>26103</b> | P      | 43 | 3.74    | 1.8E-11 | *** |
|              | G      | 1  | 6.70    | 8.6E-03 | *   |
| 27790        | P      | 43 | 4.02    | 8.6E-13 | *** |
|              | G      | 1  | 1.09    | 0.29    | ns  |
| <b>29073</b> | P      | 43 | 4.28    | 6.0E-14 | *** |
|              | G      | 1  | 41.76   | 4.6E-10 | *** |
| <b>29924</b> | P      | 43 | 4.63    | 1.5E-15 | *** |
|              | G      | 1  | 15.07   | 1.3E-4  | *** |

**Table S2:** ANOVA table for the subtrait PROPORTION TIME SPENT IN CENTER. The table contains effects of replicate (P) and genotype (G), i.e.,  $Mi\{ET1\}$  vs  $w^{1118}$ . P-values are adjusted for multiple testing using a false-discovery rate (FDR). Significance levels are indicated by asterisks; \*\*\*: FDR adjusted P-value < 0.001, \*\*: FDR adjusted P-value < 0.01, \*: FDR adjusted P-value < 0.05, ns: FDR adjusted P-value > 0.05.  $Mi\{ET1\}$  in bold indicates a significant phenotypic effect (FDR adjusted P-value<0.05) of disrupting the target gene.

| $Mi\{ET1\}$  | Effect | Df | F value | Pr(>F)  | FDR |
|--------------|--------|----|---------|---------|-----|
| 23767        | P      | 43 | 2.53    | 3.0E-06 | *** |
|              | G      | 1  | 2.79    | 0.10    | ns  |
| 24213        | P      | 43 | 1.87    | 1.6E-03 | **  |
|              | G      | 1  | 1.38    | 0.24    | ns  |
| <b>24228</b> | P      | 43 | 1.88    | 1.4E-03 | **  |
|              | G      | 1  | 10.43   | 1.4E-03 | **  |
| 24240        | P      | 43 | 1.59    | 0.015   | ns  |
|              | G      | 1  | 1.25    | 0.26    | ns  |
| <b>24283</b> | P      | 43 | 2.61    | 1.5E-06 | *** |
|              | G      | 1  | 19.83   | 1.2E-05 | *** |
| 24687        | P      | 43 | 2.24    | 5.1E-05 | *** |
|              | G      | 1  | 3.22    | 0.074   | ns  |
| <b>25509</b> | P      | 43 | 3.37    | 6.2E-10 | *** |
|              | G      | 1  | 16.90   | 5.2E-05 | *** |
| 25518        | P      | 43 | 2.38    | 1.4E-05 | *** |
|              | G      | 1  | 4.77    | 0.030   | ns  |
| <b>25519</b> | P      | 43 | 2.41    | 1.0E-05 | *** |
|              | G      | 1  | 5.45    | 2.0E-02 | *   |
| <b>25547</b> | P      | 43 | 2.02    | 4.2E-04 | *** |
|              | G      | 1  | 5.50    | 2.0E-02 | *   |
| 26103        | P      | 43 | 1.98    | 5.9E-04 | *** |
|              | G      | 1  | 1.31    | 0.25    | ns  |
| <b>27790</b> | P      | 43 | 2.51    | 3.9E-06 | *** |
|              | G      | 1  | 20.50   | 8.8E-06 | *** |
| 29073        | P      | 43 | 2.68    | 7.2E-07 | *** |
|              | G      | 1  | 2.59    | 0.11    | ns  |
| <b>29924</b> | P      | 43 | 2.92    | 6.4E-08 | *** |
|              | G      | 1  | 9.52    | 2.2E-03 | **  |

**Table S3:** ANOVA table for the subtrait NUMBER OF CLOCKWISE MOVEMENTS. The table contains effects of replicate (P) and genotype (G), i.e.,  $Mi\{ET1\}$  vs  $w^{1118}$ . P-values are adjusted for multiple testing using a false-discovery rate (FDR). Significance levels are indicated by asterisks; \*\*\*: FDR adjusted P-value < 0.001, \*\*: FDR adjusted P-value < 0.01, \*: FDR adjusted P-value < 0.05, ns: FDR adjusted P-value > 0.05.  $Mi\{ET1\}$  in bold indicates a significant phenotypic effect (FDR adjusted P-value<0.05) of disrupting the target gene.

| $Mi\{ET1\}$  | Effect | Df | F value | Pr(>F)  | FDR |
|--------------|--------|----|---------|---------|-----|
| <b>23767</b> | P      | 43 | 1.51    | 2.7E-02 | *   |
|              | G      | 1  | 21.94   | 4.4E-06 | *** |
| 24213        | P      | 43 | 1.83    | 2.2E-03 | **  |
|              | G      | 1  | 0.98    | 0.32    | ns  |
| 24228        | P      | 43 | 1.48    | 3.4E-02 | *   |
|              | G      | 1  | 2.59    | 0.11    | ns  |
| 24240        | P      | 43 | 1.54    | 2.2E-02 | *   |
|              | G      | 1  | 0.82    | 0.37    | ns  |
| 24283        | P      | 43 | 1.94    | 8.4E-04 | **  |
|              | G      | 1  | 2.44    | 0.12    | ns  |
| <b>24687</b> | P      | 43 | 1.81    | 2.4E-03 | **  |
|              | G      | 1  | 18.82   | 2.0E-05 | *** |
| 25509        | P      | 43 | 1.81    | 2.5E-03 | **  |
|              | G      | 1  | 4.38    | 0.04    | ns  |
| <b>25518</b> | P      | 43 | 1.39    | 0.06    | ns  |
|              | G      | 1  | 7.32    | 7.2E-03 | *   |
| <b>25519</b> | P      | 43 | 2.25    | 4.7E-05 | *** |
|              | G      | 1  | 14.70   | 1.6E-04 | *** |
| 25547        | P      | 43 | 2.12    | 1.7E-04 | **  |
|              | G      | 1  | 0.97    | 0.32    | ns  |
| 26103        | P      | 43 | 1.99    | 5.7E-04 | **  |
|              | G      | 1  | 0.002   | 0.96    | ns  |
| 27790        | P      | 43 | 1.82    | 2.4E-03 | **  |
|              | G      | 1  | 2.54    | 0.11    | ns  |
| <b>29073</b> | P      | 43 | 1.72    | 5.4E-03 | **  |
|              | G      | 1  | 21.03   | 6.9E-06 | *** |
| <b>29924</b> | P      | 43 | 1.44    | 4.6E-02 | *   |
|              | G      | 1  | 7.28    | 7.4E-03 | *   |

**Table S4:** ANOVA table for the subtrait NUMBER OF COUNTER-CLOCKWISE MOVEMENTS. The table contains effects of replicate (P) and genotype (G), i.e., *Mi{ET1}* vs *w*<sup>1118</sup>. P-values are adjusted for multiple testing using a false-discovery rate (FDR). Significance levels are indicated by asterisks; \*\*\*: FDR adjusted P-value < 0.001, \*\*: FDR adjusted P-value < 0.01, \*: FDR adjusted P-value < 0.05, ns: FDR adjusted P-value > 0.05. *Mi{ET1}* in bold indicates a significant phenotypic effect (FDR adjusted P-value<0.05) of disrupting the target gene.

| <i>Mi{ET1}</i> | Effect | Df | F value | Pr(>F)  | FDR |
|----------------|--------|----|---------|---------|-----|
| 23767          | P      | 43 | 1.60    | 1.4E-02 | *   |
|                | G      | 1  | 0.03    | 0.86    | ns  |
| 24213          | P      | 43 | 1.70    | 6.4E-03 | *   |
|                | G      | 1  | 0.81    | 0.37    | ns  |
| 24228          | P      | 43 | 1.46    | 4.0E-02 | *   |
|                | G      | 1  | 1.94    | 0.16    | ns  |
| 24240          | P      | 43 | 1.55    | 2.0E-02 | *   |
|                | G      | 1  | 2.85    | 0.09    | ns  |
| 24283          | P      | 43 | 1.95    | 8.1E-04 | **  |
|                | G      | 1  | 4.07    | 0.04    | ns  |
| 24687          | P      | 43 | 1.30    | 0.11    | ns  |
|                | G      | 1  | 0.38    | 0.54    | ns  |
| 25509          | P      | 43 | 1.34    | 0.09    | ns  |
|                | G      | 1  | 0.11    | 0.74    | ns  |
| 25518          | P      | 43 | 2.11    | 1.7E-04 | **  |
|                | G      | 1  | 1.11    | 0.29    | ns  |
| 25519          | P      | 43 | 1.61    | 1.3E-02 | *   |
|                | G      | 1  | 1.90    | 0.17    | ns  |
| 25547          | P      | 43 | 1.72    | 5.4E-03 | *   |
|                | G      | 1  | 0.0001  | 0.99    | ns  |
| 26103          | P      | 43 | 1.58    | 1.7E-02 | *   |
|                | G      | 1  | 3.61    | 0.06    | ns  |
| 27790          | P      | 43 | 1.67    | 7.9E-03 | *   |
|                | G      | 1  | 2.82    | 0.09    | ns  |
| 29073          | P      | 43 | 2.14    | 1.3E-04 | **  |
|                | G      | 1  | 0.61    | 0.43    | ns  |
| 29924          | P      | 43 | 2.07    | 2.6E-04 | **  |
|                | G      | 1  | 0.76    | 0.38    | ns  |

**Table S5:** ANOVA table for the subtrait NUMBER STATE SHIFTS. The table contains effects of replicate (P) and genotype (G), i.e.,  $Mi\{ET1\}$  vs  $w^{1118}$ . P-values are adjusted for multiple testing using a false-discovery rate (FDR). Significance levels are indicated by asterisks; \*\*\*: FDR adjusted P-value < 0.001, \*\*: FDR adjusted P-value < 0.01, \*: FDR adjusted P-value < 0.05, ns: FDR adjusted P-value > 0.05.  $Mi\{ET1\}$  in bold indicates a significant phenotypic effect (FDR adjusted P-value<0.05) of disrupting the target gene.

| $Mi\{ET1\}$  | Effect | Df | F value | Pr(>F)  | FDR |
|--------------|--------|----|---------|---------|-----|
| <b>23767</b> | P      | 43 | 2.70    | 5.5E-07 | *** |
|              | G      | 1  | 13.63   | 2.7E-04 | **  |
| 24213        | P      | 43 | 1.55    | 2.0E-02 | *   |
|              | G      | 1  | 2.07    | 0.15    | ns  |
| <b>24228</b> | P      | 43 | 2.34    | 2.0E-05 | *** |
|              | G      | 1  | 9.34    | 2.5E-03 | *   |
| 24240        | P      | 43 | 1.73    | 5.1E-03 | **  |
|              | G      | 1  | 0.01    | 0.93    | ns  |
| <b>24283</b> | P      | 43 | 1.65    | 9.9E-03 | *   |
|              | G      | 1  | 15.44   | 1.1E-04 | **  |
| 24687        | P      | 43 | 2.21    | 6.6E-05 | *** |
|              | G      | 1  | 0.69    | 0.41    | ns  |
| 25509        | P      | 43 | 2.03    | 3.7E-04 | *** |
|              | G      | 1  | 2.67    | 0.10    | ns  |
| 25518        | P      | 43 | 3.26    | 1.8E-09 | *** |
|              | G      | 1  | 4.76    | 0.03    | ns  |
| 25519        | P      | 43 | 1.94    | 8.0E-04 | **  |
|              | G      | 1  | 0.13    | 0.72    | ns  |
| 25547        | P      | 43 | 1.63    | 1.1E-02 | *   |
|              | G      | 1  | 0.004   | 0.95    | ns  |
| 26103        | P      | 43 | 2.01    | 4.8E-04 | *** |
|              | G      | 1  | 0.93    | 0.34    | ns  |
| <b>27790</b> | P      | 43 | 2.73    | 4.6E-07 | *** |
|              | G      | 1  | 13.53   | 2.8E-04 | **  |
| 29073        | P      | 43 | 3.18    | 4.5E-09 | *** |
|              | G      | 1  | 2.03    | 0.16    | ns  |
| 29924        | P      | 43 | 2.39    | 1.2E-05 | *** |
|              | G      | 1  | 0.65    | 0.42    | ns  |

**Table S6:** ANOVA table for the subtrait MEAN TIME INACTIVE. The table contains effects of replicate (P) and genotype (G), i.e.,  $Mi\{ET1\}$  vs  $w^{1118}$ . P-values are adjusted for multiple testing using a false-discovery rate (FDR). Significance levels are indicated by asterisks; \*\*\*: FDR adjusted P-value < 0.001, \*\*: FDR adjusted P-value < 0.01, \*: FDR adjusted P-value < 0.05, ns: FDR adjusted P-value > 0.05.  $Mi\{ET1\}$  in bold indicates a significant phenotypic effect (FDR adjusted P-value<0.05) of disrupting the target gene.

| $Mi\{ET1\}$  | Effect | Df | F value | Pr(>F)  | FDR |
|--------------|--------|----|---------|---------|-----|
| <b>23767</b> | P      | 43 | 2.49    | 4.6E-06 | *** |
|              | G      | 1  | 10.63   | 1.2E-03 | **  |
| 24213        | P      | 43 | 3.37    | 7.2E-10 | *** |
|              | G      | 1  | 1.73    | 0.19    | ns  |
| 24228        | P      | 43 | 2.91    | 7.9E-08 | *** |
|              | G      | 1  | 1.67    | 0.20    | ns  |
| <b>24240</b> | P      | 43 | 3.60    | 6.6E-11 | *** |
|              | G      | 1  | 17.95   | 3.1E-05 | *** |
| <b>24283</b> | P      | 43 | 2.40    | 1.2E-05 | *** |
|              | G      | 1  | 18.01   | 3.0E-05 | *** |
| <b>24687</b> | P      | 43 | 2.30    | 2.8E-05 | *** |
|              | G      | 1  | 5.55    | 1.9E-02 | *   |
| <b>25509</b> | P      | 43 | 2.64    | 9.9E-07 | *** |
|              | G      | 1  | 12.43   | 4.9E-04 | **  |
| <b>25518</b> | P      | 43 | 2.09    | 2.1E-04 | *** |
|              | G      | 1  | 24.07   | 1.6E-06 | *** |
| 25519        | P      | 43 | 2.13    | 1.5E-04 | *** |
|              | G      | 1  | 2.22    | 0.14    | ns  |
| 25547        | P      | 43 | 1.99    | 5.6E-04 | *** |
|              | G      | 1  | 1.32    | 0.25    | ns  |
| 26103        | P      | 43 | 3.04    | 2.1E-08 | *** |
|              | G      | 1  | 3.18    | 0.08    | ns  |
| <b>27790</b> | P      | 43 | 2.42    | 9.0E-06 | *** |
|              | G      | 1  | 15.24   | 1.2E-04 | *** |
| <b>29073</b> | P      | 43 | 2.20    | 7.6E-05 | *** |
|              | G      | 1  | 29.65   | 1.1E-07 | *** |
| 29924        | P      | 43 | 2.06    | 2.7E-04 | *** |
|              | G      | 1  | 1.77    | 0.18    | ns  |

**Table S7:** ANOVA table for the subtrait MEAN TIME ACTIVE. The table contains effects of replicate (P) and genotype (G), i.e.,  $Mi\{ET1\}$  vs  $w^{1118}$ . P-values are adjusted for multiple testing using a false-discovery rate (FDR). Significance levels are indicated by asterisks; \*\*\*: FDR adjusted P-value < 0.001, \*\*: FDR adjusted P-value < 0.01, \*: FDR adjusted P-value < 0.05, ns: FDR adjusted P-value > 0.05.  $Mi\{ET1\}$  in bold indicates a significant phenotypic effect (FDR adjusted P-value<0.05) of disrupting the target gene.

| $Mi\{ET1\}$  | Effect | Df | F value | Pr(>F) | FDR |
|--------------|--------|----|---------|--------|-----|
| <b>23767</b> | P      | 43 | 3.11    | 9E-09  | *** |
|              | G      | 1  | 28.47   | 2E-07  | *** |
| 24213        | P      | 43 | 2.06    | 3E-04  | *** |
|              | G      | 1  | 0.29    | 0.59   | ns  |
| <b>24228</b> | P      | 43 | 2.34    | 2E-05  | *** |
|              | G      | 1  | 6.14    | 1E-02  | *   |
| 24240        | P      | 43 | 1.85    | 2E-03  | **  |
|              | G      | 1  | 1.53    | 0.22   | ns  |
| <b>24283</b> | P      | 43 | 3.41    | 5E-10  | *** |
|              | G      | 1  | 18.84   | 2E-05  | *** |
| <b>24687</b> | P      | 43 | 2.77    | 3E-07  | *** |
|              | G      | 1  | 5.77    | 2E-02  | *   |
| 25509        | P      | 43 | 2.38    | 1E-05  | *** |
|              | G      | 1  | 0.09    | 0.77   | ns  |
| 25518        | P      | 43 | 3.53    | 1E-10  | *** |
|              | G      | 1  | 0.04    | 0.83   | ns  |
| 25519        | P      | 43 | 2.75    | 4E-07  | *** |
|              | G      | 1  | 3.03    | 0.08   | ns  |
| 25547        | P      | 43 | 2.85    | 1E-07  | *** |
|              | G      | 1  | 0.16    | 0.69   | ns  |
| 26103        | P      | 43 | 2.33    | 2E-05  | *** |
|              | G      | 1  | 1.74    | 0.19   | ns  |
| 27790        | P      | 43 | 3.02    | 2E-08  | *** |
|              | G      | 1  | 4.90    | 0.03   | ns  |
| <b>29073</b> | P      | 43 | 3.59    | 7E-11  | *** |
|              | G      | 1  | 14.47   | 2E-04  | *** |
| <b>29924</b> | P      | 43 | 3.06    | 1E-08  | *** |
|              | G      | 1  | 6.58    | 1E-02  | *   |

**Table S8:** ANOVA table for the subtrait MAX TIME INACTIVE. The table contains effects of replicate (P) and genotype (G), i.e.,  $Mi\{ET1\}$  vs  $w^{1118}$ . P-values are adjusted for multiple testing using a false-discovery rate (FDR). Significance levels are indicated by asterisks; \*\*\*: FDR adjusted P-value < 0.001, \*\*: FDR adjusted P-value < 0.01, \*: FDR adjusted P-value < 0.05, ns: FDR adjusted P-value > 0.05.  $Mi\{ET1\}$  in bold indicates a significant phenotypic effect (FDR adjusted P-value<0.05) of disrupting the target gene.

| $Mi\{ET1\}$  | Effect | Df | F value | Pr(>F)  | FDR |
|--------------|--------|----|---------|---------|-----|
| <b>23767</b> | P      | 43 | 2.25    | 4.7E-05 | *** |
|              | G      | 1  | 19.60   | 1.4E-05 | *** |
| 24213        | P      | 43 | 2.25    | 5.0E-05 | *** |
|              | G      | 1  | 1.98    | 0.16    | ns  |
| 24228        | P      | 43 | 1.79    | 3.0E-03 | **  |
|              | G      | 1  | 2.10    | 0.15    | ns  |
| <b>24240</b> | P      | 43 | 2.48    | 5.2E-06 | *** |
|              | G      | 1  | 15.82   | 8.9E-05 | *** |
| 24283        | P      | 43 | 2.44    | 8.5E-06 | *** |
|              | G      | 1  | 1.20    | 0.27    | ns  |
| <b>24687</b> | P      | 43 | 2.35    | 1.8E-05 | *** |
|              | G      | 1  | 9.19    | 2.7E-03 | **  |
| <b>25509</b> | P      | 43 | 2.37    | 1.5E-05 | *** |
|              | G      | 1  | 6.33    | 1.2E-02 | *   |
| <b>25518</b> | P      | 43 | 1.66    | 8.7E-03 | **  |
|              | G      | 1  | 15.30   | 1.1E-04 | *** |
| <b>25519</b> | P      | 43 | 2.15    | 1.3E-04 | *** |
|              | G      | 1  | 5.21    | 2.3E-02 | *   |
| 25547        | P      | 43 | 2.04    | 3.5E-04 | *** |
|              | G      | 1  | 1.00    | 0.32    | ns  |
| 26103        | P      | 43 | 2.17    | 1.1E-04 | *** |
|              | G      | 1  | 1.05    | 0.31    | ns  |
| <b>27790</b> | P      | 43 | 1.71    | 6.0E-03 | **  |
|              | G      | 1  | 6.11    | 1.4E-02 | *   |
| <b>29073</b> | P      | 43 | 1.96    | 6.8E-04 | *** |
|              | G      | 1  | 26.56   | 4.9E-07 | *** |
| <b>29924</b> | P      | 43 | 1.92    | 1.0E-03 | **  |
|              | G      | 1  | 14.04   | 2.2E-04 | *** |



**Table S9:** ANOVA table for the subtrait MAX TIME ACTIVE. The table contains effects of replicate (P) and genotype (G), i.e.,  $Mi\{ET1\}$  vs  $w^{1118}$ . P-values are adjusted for multiple testing using a false-discovery rate (FDR). Significance levels are indicated by asterisks; \*\*\*: FDR adjusted P-value < 0.001, \*\*: FDR adjusted P-value < 0.01, \*: FDR adjusted P-value < 0.05, ns: FDR adjusted P-value > 0.05.  $Mi\{ET1\}$  in bold indicates a significant phenotypic effect (FDR adjusted P-value<0.05) of disrupting the target gene.

| $Mi\{ET1\}$  | Effect | Df | F value | Pr(>F)  | FDR |
|--------------|--------|----|---------|---------|-----|
| <b>23767</b> | P      | 43 | 3.21    | 3.1E-09 | *** |
|              | G      | 1  | 45.23   | 9.7E-11 | *** |
| 24213        | P      | 43 | 2.07    | 2.6E-04 | *** |
|              | G      | 1  | 1.24    | 0.27    | ns  |
| 24228        | P      | 43 | 2.03    | 3.7E-04 | *** |
|              | G      | 1  | 2.99    | 0.09    | ns  |
| 24240        | P      | 43 | 1.73    | 5.2E-03 | **  |
|              | G      | 1  | 2.19    | 0.14    | ns  |
| <b>24283</b> | P      | 43 | 3.13    | 8.8E-09 | *** |
|              | G      | 1  | 6.87    | 9.3E-03 | *   |
| <b>24687</b> | P      | 43 | 1.90    | 1.2E-03 | **  |
|              | G      | 1  | 13.06   | 3.6E-04 | **  |
| <b>25509</b> | P      | 43 | 1.92    | 9.5E-04 | **  |
|              | G      | 1  | 5.51    | 2.0E-02 | *   |
| 25518        | P      | 43 | 2.43    | 8.4E-06 | *** |
|              | G      | 1  | 0.33    | 0.56    | ns  |
| 25519        | P      | 43 | 2.51    | 3.7E-06 | *** |
|              | G      | 1  | 1.04    | 0.31    | ns  |
| 25547        | P      | 43 | 2.37    | 1.5E-05 | *** |
|              | G      | 1  | 0.01    | 0.94    | ns  |
| 26103        | P      | 43 | 1.89    | 1.4E-03 | **  |
|              | G      | 1  | 1.95    | 0.16    | ns  |
| <b>27790</b> | P      | 43 | 2.26    | 4.2E-05 | *** |
|              | G      | 1  | 8.01    | 5.0E-03 | *   |
| <b>29073</b> | P      | 43 | 2.69    | 6.4E-07 | *** |
|              | G      | 1  | 8.91    | 3.1E-03 | *   |
| 29924        | P      | 43 | 2.48    | 5.3E-06 | *** |
|              | G      | 1  | 3.41    | 0.07    | ns  |

**Table S10:** ANOVA table for the subtrait PRINCIPAL COMPONENT SCORE 1. The table contains effects of replicate (P) and genotype (G), i.e.,  $Mi\{ET1\}$  vs  $w^{1118}$ . P-values are adjusted for multiple testing using a false-discovery rate (FDR). Significance levels are indicated by asterisks; \*\*\*: FDR adjusted P-value < 0.001, \*\*: FDR adjusted P-value < 0.01, \*: FDR adjusted P-value < 0.05, ns: FDR adjusted P-value > 0.05.  $Mi\{ET1\}$  in bold indicates a significant phenotypic effect (FDR adjusted P-value<0.05) of disrupting the target gene.

| $Mi\{ET1\}$  | Effect | Df | F value | Pr(>F)  | FDR |
|--------------|--------|----|---------|---------|-----|
| <b>23767</b> | P      | 43 | 4.52    | 4.7E-15 | *** |
|              | G      | 1  | 37.30   | 3.3E-09 | *** |
| 24213        | P      | 43 | 3.07    | 1.5E-08 | *** |
|              | G      | 1  | 0.55    | 0.46    | ns  |
| 24228        | P      | 43 | 2.61    | 1.6E-06 | *** |
|              | G      | 1  | 0.78    | 0.38    | ns  |
| <b>24240</b> | P      | 43 | 2.26    | 4.6E-05 | *** |
|              | G      | 1  | 2.26    | 4.6E-05 | *** |
| <b>24283</b> | P      | 43 | 4.71    | 1.1E-15 | *** |
|              | G      | 1  | 5.01    | 2.6E-02 | *   |
| <b>24687</b> | P      | 43 | 3.32    | 1.0E-09 | *** |
|              | G      | 1  | 13.06   | 3.6E-04 | **  |
| 25509        | P      | 43 | 3.23    | 2.5E-09 | *** |
|              | G      | 1  | 3.16    | 0.08    | ns  |
| <b>25518</b> | P      | 43 | 3.94    | 1.7E-12 | *** |
|              | G      | 1  | 5.08    | 2.5E-02 | *   |
| <b>25519</b> | P      | 43 | 3.83    | 5.4E-12 | *** |
|              | G      | 1  | 10.12   | 1.6E-03 | **  |
| 25547        | P      | 43 | 3.44    | 3.5E-10 | *** |
|              | G      | 1  | 0.01    | 0.91    | ns  |
| 26103        | P      | 43 | 3.01    | 2.9E-08 | *** |
|              | G      | 1  | 3.44    | 0.06    | ns  |
| 27790        | P      | 43 | 3.86    | 4.5E-12 | *** |
|              | G      | 1  | 0.92    | 0.34    | ns  |
| <b>29073</b> | P      | 43 | 4.31    | 4.7E-14 | *** |
|              | G      | 1  | 27.32   | 3.4E-07 | *** |
| <b>29924</b> | P      | 43 | 4.13    | 2.3E-13 | *** |
|              | G      | 1  | 9.54    | 2.2E-03 | **  |

**Table S11:** ANOVA table for the subtrait PRINCIPAL COMPONENT SCORE 2. The table contains effects of replicate (P) and genotype (G), i.e.,  $Mi\{ET1\}$  vs  $w^{1118}$ . P-values are adjusted for multiple testing using a false-discovery rate (FDR). Significance levels are indicated by asterisks; \*\*\*: FDR adjusted P-value < 0.001, \*\*: FDR adjusted P-value < 0.01, \*: FDR adjusted P-value < 0.05, ns: FDR adjusted P-value > 0.05.  $Mi\{ET1\}$  in bold indicates a significant phenotypic effect (FDR adjusted P-value<0.05) of disrupting the target gene.

| $Mi\{ET1\}$  | Effect | Df | F value | Pr(>F)  | FDR |
|--------------|--------|----|---------|---------|-----|
| 23767        | P      | 43 | 1.50    | 2.9E-02 | *   |
|              | G      | 1  | 0.002   | 0.97    | ns  |
| 24213        | P      | 43 | 1.94    | 8.5E-04 | **  |
|              | G      | 1  | 0.53    | 0.47    | ns  |
| 24228        | P      | 43 | 2.08    | 2.5E-04 | **  |
|              | G      | 1  | 4.46    | 0.04    | ns  |
| 24240        | P      | 43 | 2.15    | 1.3E-04 | **  |
|              | G      | 1  | 4.54    | 0.03    | ns  |
| <b>24283</b> | P      | 43 | 1.71    | 6.2E-03 | *   |
|              | G      | 1  | 15.21   | 1.2E-04 | *** |
| 24687        | P      | 43 | 1.63    | 1.1E-02 | *   |
|              | G      | 1  | 1.61    | 0.21    | ns  |
| <b>25509</b> | P      | 43 | 1.80    | 2.7E-03 | **  |
|              | G      | 1  | 6.09    | 1.4E-02 | *   |
| <b>25518</b> | P      | 43 | 1.69    | 6.9E-03 | *   |
|              | G      | 1  | 13.60   | 2.7E-04 | **  |
| 25519        | P      | 43 | 1.44    | 0.04    | ns  |
|              | G      | 1  | 1.91    | 0.17    | ns  |
| 25547        | P      | 43 | 0.97    | 0.52    | ns  |
|              | G      | 1  | 0.30    | 0.58    | ns  |
| 26103        | P      | 43 | 1.96    | 7.0E-04 | **  |
|              | G      | 1  | 0.05    | 0.82    | ns  |
| <b>27790</b> | P      | 43 | 1.68    | 7.5E-03 | *   |
|              | G      | 1  | 15.35   | 1.1E-04 | *** |
| 29073        | P      | 43 | 1.64    | 9.9E-03 | *   |
|              | G      | 1  | 5.44    | 0.02    | ns  |
| 29924        | P      | 43 | 1.30    | 0.11    | ns  |
|              | G      | 1  | 1.96    | 0.16    | ns  |
